# Supplementary material for: Profile of Anatomy Teachers of Students in Healthcare Professions: A Scoping Review
Source: Research Square preprint supplement (doi:10.21203/rs.3.rs-7468584/v1), 2025-10-27
Supplement: Supplementary file 1 [file 79314462b0f43d53999034d5.docx]

**Profile of Anatomy Teachers of Students in Healthcare Professions: A Scoping Review**

**Appendix 1**

Illustration of search strategy developed on July 16, 2024, by librarian M.C.D. - database: Ovid MEDLINE(R) ALL <1946 to July 15, 2024>.

| # | Query | Results from 16 Jul 2024 |
| --- | --- | --- |
| 1 | Exp Anatomy/ | 410,576 |
| 2 | Cadaver/ | 47,055 |
| 3 | Dissection/ | 13,205 |
| 4 | (anatom* or cadaver* or dissection?). ti,ab,kf. | 629,489 |
| 5 | (histology or morpholog* or neuroanatomy or osteology).ti,ab,kf. | 949,844 |
| 6 | Or/1-5 | 1,880,732 |
| 7 | Anatomists/ | 323 |
| 8 | Teacher training/ | 544 |
| 9 | Teaching/ | 52,375 |
| 10 | Professional Competence/ | 25,236 |
| 11 | Career Choice/ | 26,023 |
| 12 | Workforce/ | 67,602 |
| 13 | Job application/ | 2,658 |
| 14 | Job description/ | 11,177 |
| 15 | Personnel selection/ | 13,755 |
| 16 | ((teacher* or professor* or educator* or instructor* or lecturer* or demonstrator*) adj3 (profil* or background or training or certific* or competence? or credential? or qualification? or accredit* or skill* or licens*)).ti,ab,kf. | 7,256 |
| 17 | (((anatom* or cadaver? or dissection or neuroanatom* or osteolog*) adj3 (teach* or professor* or educat* or lecturer* or instructor* or demonstrato*)) or anatomist*).ti,ab,kf. | 7,044 |
| 18 | Or/7-17 | 195,819 |
| 19 | Exp education, medical/ | 189,690 |
| 20 | Exp education, nursing/ | 91,009 |
| 21 | Exp Education, Dental/ | 20,660 |
| 22 | Exp education, pharmacy/ | 9,823 |
| 23 | Exp students, health occupations/ | 92,163 |
| 24 | ((medical or (health adj2 (personnel or professional?))) adj2 (student? or resident? or undergrad? or graduat*)).ti,ab,kf. | 76,959 |
| 25 | ((nurse? or nursing or physiotherapist* or ((physical or occupational or speech) adj2 therapist*) or dentist* or rehabilitation) adj2 (student? or resident? or undergrad? or graduat*)).ti,ab,kf. | 45,437 |
| 26 | or/19-25 | 395,030 |
| 27 | 6 and 18 and 26 | 3,240 |
| 28 | limit 27 to (english or french) | 2,962 |

**Appendix 2**

**Table 1A – Publication characteristics of included studies presented in the scoping review, from most to less recent publications.**

|  | **Lead author** | **Year of publication** | **Publication journal** | **Journal’s impact factor** | **Country of data collection** | **Funding source** | **Study registration** |
| --- | --- | --- | --- | --- | --- | --- | --- |
| Study 1 | Dissaux Brieg | 2024 | Surg Radiol Anat | 1.4 | France | NA | NA |
| Study 2 | Milian Eryn K. | 2024 | ASE | 4.73 | United States | NA | NA |
| Study 3 | Cheng Xin | 2023 | Peer J | 2.7 | China | Jinan University and MOOC Committee of Undergraduates Courses in Guangdong Province. | NA |
| Study 4 | Guerrero-Mendivil Francisco Daniel | 2023 | ASE | 4.73 | Mexico | NA | NA |
| Study 5 | Edwards Danielle N. | 2023 | ASE | 4.73 | United States | NA | NA |
| Study 6 | Veazey Kathryn | 2023 | ASE | 4.73 | United States | NA | NA |
| Study 7 | Mitchell Katy | 2022 | Internet J. Allied Health Sci. Pract. | 0.5 | United States | NA | NA |
| Study 8 | Farfán Emilio | 2021 | Int. J. Morphol. | 0.49 | Chili | NA | NA |
| Study 9 | Salinas-Alvarez Yolanda | 2021 | ASE | 4.73 | Mexico | NA | NA |
| Study 10 | Haladay Douglas | 2020 | J. Phys. Ther. Educ. | 1.06 | United States | NA | NA |
| Study 11 | Langley Natalie | 2020 | Med. Sci. Educ. | 1.75 | United States | NA | NA |
| Study 12 | Chia Terkuma I. | 2020 | J. Taibah Univ. Med. Sci. | 1.75 | Nigeria | NA | NA |
| Study 13 | Giuriato Rosemary | 2020 | ASE | 4.73 | Australia | NA | NA |
| Study 14 | Wilson Adam B. | 2020 | ASE | 4.73 | Canada, United States, European Union* | NA | NA |
| Study 15 | Lazarus L. | 2019 | Folia Morphol. | 1.2 | South Africa | NA | NA |
| Study 16 | Schaefer  Audra F. | 2019 | ASE | 4.73 | United States | NA | NA |
| Study 17 | Shead  Dorothy A. | 2018 | ASE | 4.73 | South Africa | NA | NA |
| Study 18 | Rhodes Danielle | 2018 | ASE | 4.73 | Australia | NA | NA |
| Study 19 | Kosif R. | 2016 | Bratisl. Med. J | 1.50 | Turkey | NA | NA |
| Study 20 | Brokaw James J. | 2016 | ASE | 4.73 | United States | NA | NA |
| Study 21 | Reyes-Hermàndez Cynthia Guadalupe | 2015 | ASE | 4.73 | Mexico | NA | NA |
| Study 22 | Celebi N. | 2012 | Ultraschall Med. | 3.1 | Germany | Tübinger Profil | NA |
| Study 23 | Kerby Jane | 2011 | Clin. Anat. | 2.3 | United Kingdom | NA | NA |
| Study 24 | Bergman E. M. | 2011 | Med. Teach. | 4.9 | Netherlands | NA | NA |
| Study 25 | Craig Steven | 2010 | ANZ J. Surg | 0.80 | Australia, New Zealand | NA | NA |
| Study 26 | Pabst Reinhard | 2009 | Ann. Anat. | 2.36 | United States, Europe | NA | NA |
| Study 27 | Kramer Beverley | 2008 | ASE | 4.73 | Egypt, Nigeria, Uganda, Zambia, Malawi, Republic of South Africa | NA | NA |
| Study 28 | Bergman Esther | 2008 | ASE | 4.73 | Netherlands | NA | NA |
| Study 29 | Ganske Ingrid | 2006 | Acad. Radiol. | 3.08 | United States, Canada | NA | NA |
| Study 30 | Heylings D.J.A. | 2002 | Med. Educ | 7.647 | United Kingdom, Ireland | NA | NA |
| Study 31 | Koshi Rachel | 2001 | Clin. Anat. | 2.3 | India | Fluids research of Christian Medical College | NA |
| Study 32 | Plaisant O. | 2001 | La Presse Médicale | 2.7 | United States, France | NA | NA |
| Study 33 | Willan  Peter L.T. | 1999 | Clin. Anat. | 2.3 | United Kingdom | NA | NA |
| Study 34 | Cottam  Wayne W. | 1999 | Clin. Anat. | 2.3 | United States | NA | NA |
| Study 35 | Berube Debra | 1999 | J. Phys. Ther. Educ | 1.06 | United States | NA | NA |
| Study 36 | Collins  Thomas J. | 1994 | Clin. Anat. | 2.3 | United States, Canada | The Florence and Marie Hall Endowment for Excellence in Medical Education |  |
| Study 37 | Miller S. | 1994 | Ann. R. Coll. Surg. Engl. | 0.8 | United Kingdom, Ireland | NA | NA |
| Study 38 | Mattingly  Gary E. | 1994 | Phys. Ther. | 3.5 | United States | NA | NA |
| Study 39 | Monkhouse W.S | 1993 | Clin. Anat. | 2.3 | Ireland | NA | NA |
| Study 40 | Willan P.L.T. | 1992 | Clin. Anat. | 2.3 | England, United Kingdom | NA | NA |
| Study 41 | Hooper  A. C. B. | 1980 | Ir. Med. J | 0.17 | Republic of Ireland, United Kingdom | NA | NA |
| Study 42 | Eldred Earl | 1961 | J. Med. Educ. | _ | United States, Canada | NA | NA |

**Job posting sites in the United States, Canada, European Union through multisource distribution mechanisms, including the Anatomy Connected message board of the AAA (American Association of Anatomists ), member distribution lists: i.e., AACBNC (Association of Anatomy, Cell Biology, and Neurobiology Chairpersons), Anatomical Society of the United Kingdom and Ireland, and the Trans-European Pedagogic Anatomy Research Group of the European Federation of Experimental Morphology; Twitter.*

**Table 1B: Selection characteristics of studies included in the scoping review presented according to their publications, from most to less recent.**

| **Study** | **Design** | **Sampling** | **Participants** | **Health Profession** | **Inclusion criteria** | **Exclusion criteria** |
| --- | --- | --- | --- | --- | --- | --- |
| Study 1 | Quantitative | 26 participants | Members of anatomy centers and who teach anatomy | Mainly medicine. Others (maieutic, odontology, nursing, speech therapy, occupational therapy, psychomotricity, physiotherapy, other rehabilitation professions, etc.) | Anatomy centers who have members in the French Medical College of Processors of Anatomy (FMCPA). All responses to relevant questions on teaching strategies. | All non-member center of the FMCPA. All duplicate responses by the anatomy centers and incomplete or non-relevant responses. |
| Study 2 | Quantitative | 85 participants | Anatomy teachers in accredited physiotherapy programs in the United States | Physiotherapy | Physiotherapy programs in the United States accredited by the American Physical Therapy Association **(APTA)** and the Commission on Accreditation in Physical Therapy Education **(CAPTE)**. Be an anatomy teacher and willing to participate. | Programs not accredited by APTA and CAPTE. Incomplete responses or those from people not involved in anatomy teaching. All schools have responded after the set deadline. |
| Study 3 | Quantitative | 297 participants | Anatomy teachers | Medicine | Anatomy teachers having worked in anatomy departments of medical schools in Western China. Have completed the consent form. | Questionnaires that were not completed during the active survey period. Not being anatomy teachers. |
| Study 4 | Quantitative | 59 participants | Near-Peer medical students | Medicine | Be members of the Near-Peer-Teaching (NPT) training program and involved in educational activities related to their academic training. Be willing to take part in the survey. | Not being a member of the NPT training program. Not being involved in educational activities and not having responded to the questionnaires. |
| Study 5 | Mixed | 52 participants | Teachers and department heads | Medicine | Anatomy teachers who indicated teaching as their main responsibility. Be willing to participate and give their informed consent before completing the questionnaires. | If teaching is not the main responsibility of participants such as administrators, other staff. Not having given their consent before completing the questionnaires. Incomplete responses or those not relevant to anatomy teaching. |
| Study 6 | Mixed | 68 institutions | Directors and faculty members | Occupational therapy | Be occupational therapy program directors with a role in the management of anatomy teaching. To have anatomy teaching experience in occupational therapy programs. Be willing and give their informed consent. | Programs that do not offer anatomy courses. Participants who are not directors of occupational therapy programs and/or are not involved in anatomy teaching or its management. Incomplete or non-relevant responses. |
| Study 7 | Quantitative  (descriptive and comparative) | 72 participants | Program directors and anatomy teachers | Physiotherapy | Programs accredited by the Commission on Accreditation of Physical Therapy Education (CAPTE). Be anatomy teachers with teaching experience. Be certified teachers, especially those with more than 5 years of experience. | Not being anatomy teachers in physiotherapy programs and/or having had no teaching experience. Incomplete and non-relevant responses. |
| Study 8 | Quantitative | 36 universities in Chili (213 morphologists) | Morphology teachers | Medicine, health sciences faculties | Be professionals involved in teaching and agree to respond to online surveys, then participate in the study. | People who have no involvement with teaching and did not respond to the surveys. |
| Study 9 | Quantitative | 110 participants | Anatomy teachers | Medicine | Be a member and/or educator in the Medical Sciences Association (MSA). Teachers who teach a relevant course (general anatomy, neuroanatomy, embryology, etc.). | Teachers who have not taught specific courses. Teachers who have no profile as educators or in medical sciences. |
| Study 10 | Mixed | 31 participants | 3rd-year physiotherapy students who teach 1st-year students | Physiotherapy | Be a 3rd-year student enrolled in a doctoral program in physiotherapy or a related program. Have actively participated in course modules and anatomy laboratory activities (dissection, use of anatomical models). Have given their informed consent and agreed to respond to anonymous surveys. | Participants who were not in a physiotherapy program, including those in medicine or other healthcare disciplines. Those not having taken anatomy courses or laboratory sessions. Students with physical limitations preventing them from participating in dissections or who have conflicts of interest or have not given their informed consent. |
| Study 11 | Quantitative | 305 participants | Student graduates in anthropology biology hired as teaching assistants | Anthropology  Biology | Have obtained or are in the process of obtaining a master’s or doctorate degree in anthropology biology. Be involved in anatomy teaching or research. Be willing to respond to the online survey and be a member of a professional association, e.g., the American Academy of Forensic Sciences, the American Association of Anatomists, or sub-groups of the American Association of Physical Anthropologists. | Those who are not teaching or do not conduct anatomical research and those who did not complete the online questionnaire. |
| Study 12 | Quantitative | 56 participants | Members of teaching faculty actively involved in anatomy teaching and research | Undergraduate programs: (MBBS: Bachelor of Medicine/Bachelor of Surgery), anatomy, physiology, dentistry, radiology, pharmacy, nursing, medical laboratory sciences, physiotherapy, public health, nutrition, pharmacology, optometry | Have participated in the 16th annual conference of the Anatomical Society of Nigeria (ASN) held at the University of Calabar, from October 9 to 12, 2019. Teach and conduct anatomical research. Be a faculty member in Nigerian universities or other related healthcare institutions. Be willing to participate in the study. | Not having participated in the ASN conference in 2019. Those who are not part of a faculty and do not teach any anatomy courses. All incomplete responses were invalid. |
| Study 13 | Quantitative | 4 institutions | Directors of Chiropractic programs | Chiropractic | Be directors of chiropractic programs in institutions accredited by the Council on Chiropractic Education in Australia (CCEA). Be an anatomy teacher and have received the survey questionnaire via their respective program director. | All chiropractic schools that did not respond to the study or that do not have valid ethical approval to participate in the study. Teachers are not involved in teaching anatomy in a chiropractic program. |
| Study 14 | Quantitative | 133 participants | Members of the research committee and anatomy department administrators of all types (departmental directors, research committee chairs and vice-chairs, members of the research committee) | Allopathic medicine, osteopathic medicine, dentistry, others (not specified) | Anatomy teacher job postings for the United States, Canada and European Union for university programs offering anatomy courses. Postings with detailed descriptions of positions including the name and type of institution, healthcare profession, job rank and academic qualifications requirements. Directors of anatomy departments having sat on a teacher recruitment committee within the last 5 years. | All responses from participants outside Canada, United States and the European Union. All duplicate job postings, of which only the first was considered, and/or all postings not related to healthcare professions or to anatomy teaching. People not having been heads of anatomy departments within the last 5 years. Questionnaires with incomplete responses. |
| Study 15 | Qualitative | 18 participants | Anatomy professors and clinicians | Medicine, nursing, physiotherapy, occupational therapy, speech therapy, dental therapy, oral hygiene, optometry, pharmacy | Be teachers involved in anatomy teaching in South Africa with 6 to 40 years of experience. Give their informed consent. Also included are two clinicians willing to participate in validating perceptions on anatomical skills. | Not being an anatomy teacher. Not having given their informed consent and having had less than 6 years or more than 40 years of experience in teaching anatomy. |
| Study 16 | Mixed | 64 institutions | Anatomy teachers, coordinators and near-peers | Medicine | Educators who teach anatomical sciences content to 1st-year students, graduate students or professionals in practice. | Teachers who do not teach anatomy courses. |
| Study 17 | Quantitative | 7 participants in 6 universities | Coordinators of anatomy courses for undergraduate physiotherapy students | Physiotherapy | Have worked in one of the 8 faculties of health sciences in South Africa in a 1st-year physiotherapy (PT) program in 2016. Faculties offering a physiotherapy program during the 2016 academic year. Agreement from department heads or school heads to invite anatomy coordinators to take part in the study. | Not being a physiotherapy course coordinator or being part of a program that does not offer anatomy courses. Incomplete or non-relevant responses. |
| Study 18 | Qualitative | 39 articles from 28 different institutions in 20 countries | Sessional anatomy teachers (cross-grade teachers, near-peer teachers, peer-to-peer teachers) | Medicine | Session professors in undergraduate and graduate medical programs. Studies involving topographic anatomy teaching. Study using imaging technologies (e.g., ultrasound) whose main objective was to teach topographic anatomy to students. Studies on session teachers having advanced knowledge of anatomy compared to their student learners; peer teachers who have training or laboratory sessions in which learners have not participated; peer teachers in short-term (<1 year), temporary or occasional positions including those hired on a full-time, part-time or non-contractual basis; teachers who teach more than a single class session; teachers with commitments throughout the term. Also included are primary research articles, theses and descriptive reports, only articles published in English with no publication date or geographic restriction. | Articles dealing solely with teaching histology, embryology or pathology. Studies not specifically involving topographic anatomy or dealing with the development of surgical skills, clinical examination, clinical reasoning skills and professionalism regardless of anatomical knowledge. Teachers in permanent, continuous or tenured positions, described as faculty members, guest instructors who teach a single class session, and teachers hired for part of the term but not for the full term. Letters to the editor, opinion articles, review articles, conference abstracts and other documents not submitted to peer review, any language other than English. |
| Study 19 | Quantitative | 79 participants | Anatomists | Medicine | Be an anatomy teacher and have responded to the questionnaire sent by email. Have fully completed the questionnaire, including questions related to personalities and professional interests. | Teachers to whom the email invitation was not sent. Questionnaires with incomplete responses. |
| Study 20 | Qualitative | 9 participants | Faculty members of two medical faculties: Indiana University School of Medicine (IUSM) and Marian University College of Osteopathic Medicine (MU-COM) | Schools of allopathic and osteopathic medicine | Professors in the Department of Anatomy and Cellular Biology at IUSM and the Department of Biomedical Sciences at MU-COM. Have taught anatomy-related content. Have had predominant teaching and research roles. Have given their informed consent in writing. | Professors who teach content other than anatomical sciences and who have not given written consent. |
| Study 21 | Quantitative | 120 participants | Medical students hired as teacher-tutors | Medicine | Be between 2nd and 5th year and have had roles such as instructor of theories, clinical hours, medical imaging or laboratories. Have passed the anatomy course with an average > 8.0, have participated in anatomy course activities involving a minimum of 12 hours per week and have participated in all weekly training sessions organized by the tenured teachers within the department. | Students not having met the criteria assigned to instructor roles and who have not obtained an overall average of  > 8.0. |
| Study 22 | Quantitative | 50 participants | Anatomy teachers, medical student-tutors, medical students | Medicine | Medical students between 2nd and 6th year were enrolled in the tutorial course. Have given their consent in writing. Have had no prior ultrasound training. | Having had ultrasound training. Not being in the required academic year range and not having given their informed consent. |
| Study 23 | Quantitative | 302 participants | Anatomy teachers, medical students | Medicine | Students in the 2nd year having taken the anatomy course covering lectures, dissection, prosection, small group teaching, living and exploratory anatomy. Have agreed to participate in the study. | Those who did not take an anatomy course and who submitted questionnaires with incomplete responses. |
| Study 24 | Mixed | 32 articles with 302 participants | Anatomists, students | Medicine | Articles published in English, German and Dutch from medical schools, published between 1950 and 2007. Studies covering the effects of teaching methods on knowledge of anatomy. | Studies dealing with all professions other than medicine. Articles published in languages other than those predefined and not covering the impact of methods on teaching. |
| Study 25 | Quantitative | 21 medical schools  (19: Australia; 2: New Zealand) | Anatomy teachers | Medicine | Data on anatomical teaching and evaluation in medical schools in Australia and New Zealand during the 2008 academic year. Participants who are actively teaching anatomy. | Data not from the 2008 academic year. Studies conducted in other countries and/or not dealing with anatomy teaching or evaluation. Participants who will not be actively teaching anatomy. |
| Study 26 | Mixed | The review covered several articles but the exact number is not defined | Anatomy teachers, clinicians, medical students | Medicine | Studies on teachers, anatomists and clinicans who teach anatomy courses. Students in the 1st, 2nd and 3rd year who are taking anatomy courses. Medical institutions that have made recent changes to their anatomy programs. | Studies dealing with clinicians who do not teach anatomy. Studies dealing with old fashioned and non-modern teaching approaches. Studies with samples that are not statistically representative. |
| Study 27 | Quantitative | 19 medical schools | Anatomy teachers, anatomists, and medical students | Medicine | Participants in anatomy departments or medical schools teaching anatomy. | Anatomy courses not taught to medical students. |
| Study 28 | Quantitative | Survey sent to departments and deans of medical schools (exact number not stated) | Anatomy teachers, clinicians, medical students | Medicine | Anatomy departments and deans of medical schools who teach anatomy to students. Francophone and Anglophone schools. | Teachers or departments not directly involved in teaching anatomy. Other healthcare professions. |
| Study 29 | Quantitative | 80 participants | Anatomy course directors | Medicine | Medical schools that are part of the Association of American Medical Colleges (AAMC) in institutions of the United States and Canada. Be deans of medical schools, deans of education and anatomy course directors. Schools with accessible electronic addresses. | Duplicate, incomplete or non-relevant responses. |
| Study 30 | Quantitative | 21 participants | Deparment heads | Medicine | Be department heads of medical schools or an authorized representative. Be part of 28 pre-identified medical schools. Only data from the 1999-2000 academic year were considered. | All schools not part of the pre-identified 28 medical schools. Not being a department head or member authorized to respond. Incomplete or non-relevant responses not corresponding to the 1999-2000 academic year. |
| Study 31 | Quantitative | 67 participants | Former anatomy demonstrators | Medicine | Former demonstrators who worked at Christian Medical College (CMC) in Vellore, India, between 1957 and 1998, having valid postal addresses in order to receive the questionnaire. All complete responses. | All incomplete responses. Those who did not respond to the initial invitation or the additional reminder. |
| Study 32 | Qualitative | 14 medical schools:  (5 American and 9 French) | Anatomy teachers and medical students | Medicine | Included are all the universities where contact was made with the research team. | Universities that were not contacted. |
| Study 33 | Quantitative | 465 participants | Medical graduates | Medicine | Teachers who applied for anatomy positions. | Hiring positions combining anatomy and ophthalmology. |
| Study 34 | Quantitative | 903 participants (126 anatomy departments) | Heads of anatomy departments and residency programs*, associate teachers | Medicine | Anatomy departments identified by the Directory of American Medical Education between 1996 and 1997. Residency programs in family medicine and others** identified by the Graduate Medical Education Directory between 1996 and 1997. Have responded to the survey by regular mail, fax or internet. | Anatomy departments or residency programs not found in the Directory of American Medical Education and the Graduate Medical Education Directory. Not having received any response after 3 consecutive mailings of questionnaires as a reminder. |
| Study 35 | Quantitative | 110 participants | Anatomy teachers | Physiotherapy | Be the main anatomy teachers in physiotherapy programs in the United States. Are part of 162 physiotherapy programs accredited by the American Physical Therapy Association in 1996. | Not being anatomy teachers. All programs not accredited by the American Physical Therapy Association in 1996. No response to the survey within the required time frame. |
| Study 36 | Quantitative | 112 participants | Chairs of anatomy departments of each medical school | Medicine | Anatomy departments of medical schools included in the Directory of the American Association of Anatomists (AAA). | Anatomy departments not listed in the Directory of the AAA. No response to the questionnaires in Fall 1991 and Spring 1992. |
| Study 37 | Quantitative | 206 participants (26 anatomy departments) | Anatomy demonstrators | Medicine (particularly surgery) | Data from anatomy departments employing anatomy demonstrators in the United Kingdom and Ireland between 1990 and 1993. | Departments that have no anatomy demonstrators. Anatomy departments outside the United Kingdom and Ireland. Questionnaires with incomplete responses. |
| Study 38 | Quantitative | 103 physiotherapy programs | Members of physiotherapy departments (whether teachers or not, physiotherapists or not) | Physiotherapy (this anatomy course is also followed by other disciplines: occupational therapy, medical aid, nursing, sports training) | Anatomy teachers in physiotherapy training or education programs, whether physiotherapists or not. Only questionnaires returned by regular mail after the postal reminder were included. Have been part of the 123 physiotherapy programs established and 22 programs in development identified. | Programs not part of those identified previously. Not being a senior anatomy teacher. All incomplete responses. |
| Study 39 | Quantitative | Cohort of students in 1st year (preclinical students) and 2nd year (clinic students) of medical schools in 1991, but the exact size was not stated | Medical students | Medicine | Medical students in 2nd and 3rd year who agreed to provide honest feedback on their anatomy teachers at the Royal College of Surgeons in Ireland. | Not being present during data collection or having given incomplete responses. |
| Study 40 | Quantitative | 83 participants | Former anatomy demonstrators | Medicine | Be a former anatomy demonstrator between 1975 and 1986 in England and have held this position for at least 4 months at the University of Manchester. | Not having been an anatomy demonstrator during this period at the University of Manchester. Having held the position of anatomy demonstrator for less than 4 months. |
| Study 41 | Quantitative | 17 participants (5 professors and 12 lecturers in 5 medical schools) | Career anatomists and others | Medicine | All permanent or temporary teachers in medical schools in Ireland. All members of teaching staff who have a medical degree. Anatomy departments of the 5 medical schools in the Republic of Ireland. | All teaching staff or those in the field of research not participating in teaching anatomy. Non-Irish anatomy departments. All non-physician teaching staff. |
| Study 42 | Quantitative | Total data from professional associations such as the American Association of Anatomists on all anatomy teachers and researchers in medical institutions in the United States and Canada, but the exact size is not stated | Anatomy teachers | Medicine, dentistry, nursing, pharmacy, public health, occupational therapy, physiotherapy, radiographic technology | Be an anatomy teacher or researcher working in departments of anatomy. Be a professional teaching anatomy and have a degree in advanced anatomy (PhD or MD). Recognized medical schools in the United States and Canada. | Veterinary schools and schools teaching verterinary anatomy. Anatomy teachers with a bachelor’s degree. Anatomists not working in the university environment. |

********Directors of anatomy departments, course directors, former acting department director, directors and vice-directors of hospital residency programs, departmental directors or vice-directors, division heads, Assistant Directors, program associates, professors or chief residents.*

***Family medicine (440 programs), diagnostic radiology (204 programs), emergency medicine (112 programs), and general surgery (266 programs), for a total of 1022 programs included.*

**Table 2- Socio-demographic characteristics of anatomy teachers and their years of experience teaching anatomical sciences.**

| **Socio-demographic characteristics of anatomy teachers** | | | | | | |
| --- | --- | --- | --- | --- | --- | --- |
| **Gender1** | | | | | | |
| **Male > Female** | | | | | | |
| Studies 3 | | | | M: 56.2%; F: 43.8% | | |
| Studies 7 | | | | M: 51.4%; F: 48.6% | | |
| Studies 8 | | | | M: 68; F: 32 | | |
| Studies 9 | | | | F: 20.8% | | |
| Studies 12 | | | | M: 38 (67.9%); F: 18 (32.1%) | | |
| Studies 19 | | | | M: 53 (67.1%); 26 (32.9%) | | |
| Studies 31 | | | | M: 45; F: 22 | | |
| Studies 33 | | | | Years: 1991-1992 (M: 90%, F: 10%); 92-93 (M: 86%, F: 14%); 93-94 (M: 87%, F: 13%); 94-95 (M: 87%, F: 13%); 95-96: (M: 84, F: 16); 96-97 (M: 69%, F: 31%); 97-98 (M: 78%, F: 22) | | |
| Studies 40 | | | | M: 76, F: 7 | | |
| Studies 42 | | | | Only F: 7.3% in 1959 | | |
| **Female > Male** | | | | | | |
| Studies 4 | | | | F: 66% | | |
| Studies 5 | | | | F: 53.6%, M: 43.6% | | |
| Studies 10 | | | | M: 18%, F: 82% | | |
| Studies 17 | | | | F: 4, M: 2 | | |
| **Studies with equal gender representation or gender differences among the teacher groups studied** | | | | | | |
| Studies: 15 | | | | M: 50%; F: 50% | | |
| Studies: 21 | | | | M: 53%, F: 41%, NA: 6% | | |
| Studies: 20 | | | | M: 5, F: 0 at IUSM; M: 2, F: 2 at MU-COM | | |
| Studies: 22 | | | | F: 13, M: 11; M: 11, F: 11 | | |
| **Age2** | | | | | | |
| **Articles** | | **Less than age 35** | | | | **Age 35+** |
| Studies 3 | | 4.4%: age 21–31 | | | | 44.1%: age 41–50; 27.3%: age 31-40, 22.6%: age 51-60; 2) age 60+ |
| Studies 5 | | 15.5%: age 25-34 | | | | 30.9%: age 35-44, 24.5%: age 55-64, 19.1%: age 45-54, 9.1%: age 65-74, 1%: age 75+ |
| Studies 9 | | _ | | | | 53.6%: age 31-50 |
| Studies 12 | | 21.4%: age 21-31 | | | | 48.2%: age 31-40; 21.4%: age 41-50; 8.9%: age 51-60 |
| Studies 19 | | 27.8% < age 35 | | | | 29.1% between age 46 and 50; 17.7% over age 51; 13.9%: age 41-45; 11.4%: age 36-40 |
| Studies 20 | | IUSM: age 29-67 | | | | (IUSM): age 29-67; (MU-COM): age 32-45 |
| Studies 21 | | Average age: 20.48; those who teach theoretical concepts of anatomy (age 19), clinical hours (age 20), radiological imaging (age 21), in dissection laboratories (age 22) | | | | _ |
| Studies 22 | | Average age: 25.3 (tutor group) | | | | _ |
| Studies 24 | | _ | | | | More than 3/4 of anatomy professors with a medical qualification are over age 50. |
| Studies 32 | | Average age: (United States): 23.9;  (France): 22 | | | | _ |
| Studies 33 | | Average age: 26 | | | | Age range: age 22-61 |
| Studies 40 | | Average age: 25 | | | | _ |
| Studies 41 | | _ | | | | Ireland (1978): 36% < age 45, 64% >/= age 46 / 1968: 59% < age 45, 41% >/= age 46  United Kingdom (teachers with medical degrees): 47% < age 45, 53% >/= age 46 / (degrees in dentistry): 71% < age 45, 29% >/= age 46 |
| **Anatomy teachers’ years of teaching experience3** | | | | | | |
| **Articles** | **0 to 10 years** | | **10 to 20 years** | | **More than 20 years** | |
| Studies 2 | _ | | _ | | 36.9%: 20+ years | |
| Studies 3 | 24.2%: </= 10 years | | 38.1%: 11-20 years | | 24.6%: 21-30 years; 13.1%: 30+ years | |
| Studies 4 | 1-2 semesters (6 months-1 year)  3-4 semesters (1.5-2 years)  5-7 semesters (2.5-3 year (s))  7+ semesters (3.5+ years) | | _ | | _ | |
| Studies 6 | 35.4%: 0-9 years | | 29.2%: 10-19 years | | 15.4%: 20-29 years; 1.5%: 30+ years | |
| Studies 7 | 43 respondents: </= 10 years | | 26: 11+ years | | _ | |
| Studies 8 | 18.3%: < 5 years  34.7%: 5-10 years | | 24.4%: 10-15 years; 9.4%: 15-20 years | | 13.1%: > 20 years | |
| Studies 12 | 19 respondents: </= 3 years; 10: </= 6 years; 4: </= 9 years | | 6: </= 12 years; 7: </= 15 years; 4: </= 18 years | | 3: </= 21 years; 2: </= 24 years; 1: =/> 25 years | |
| Studies 15 | 2 respondents: < 6 years | | _ | | 9 respondents: 20+ years up to 40 years | |
| Studies 16 | 1-5 years; 6-10 years | | _ | | _ | |
| Studies 17 | An average of: 8.6 years | | _ | | _ | |
| Studies 20 | MU-COM: 3-7 years  IUSM: 3+ years | |  | | IUSM: </= 37 years | |
| Studies 31 | Majority have at least 1 year | | _ | | _ | |
| Studies 35 | 25.1%: at least 5 years; 21.4%: 6-10 years | | 12%: 11-15 years; 15.9%: 16-20 years | | 11.2%: 21-25 years  14.6%: 25+ years | |

*1This review shows male gender predominance in the anatomy teacher population, with some exceptions where women are very represented or equal gender representation is observed, which suggests variations depending on the study and period in question.*

*2This table shows that anatomy teachers are for the most part older than 35, although some authors indicate a significant number of them are less than 35.*

*3In all of the included articles, anatomy teachers’ years of experience ranging between 0 and 10 years is the most represented, followed by the range of 20+ years.*

**Table 3-** **Academic titles, academic contracts, university degrees and academic training previously obtained by anatomy teachers by continent.**

|  | **Academic titles** | **Academic contracts** | **University degrees*** | **Academic training*** |
| --- | --- | --- | --- | --- |
| **Africa** | | | | |
| Studies 12 | Lecturers, associate teachers, senior lecturers, teacher-tutors | N/A | Master’s degree, bachelor’s degree, academic doctorate (PhD), professional doctorate (MD) | Anatomy (48 teachers have M., 43 Bac, 25 PhD, 48 PhD in progress), 2 in postdoctoral training, 12 MBBS teachers and 4 in dentistry. |
| Studies15 | Full professors | N/A | Professional doctorate (MD), master’s degree, academic doctorate (PhD), bachelor’s degree | Anatomy or related field (PhD: 8 teachers out of 17), MBBS (6/17). Medical sciences (M: 4/17). Education sciences (Bac 1/17). Non-anatomist research scientists (PhD). |
| Studies 17 | N/A | N/A | Academic doctorate (PhD), master’s degree, bachelor’s degree, enhanced degree | Anatomy, physiotherapy, biomedical sciences (M or PhD; Bac for some) |
| Studies 27 | Lecturers | N/A | Professional doctorate (MD), master’s degree, academic doctorate (PhD) | Medicine (sometimes M or PhD also). Anatomy (M, PhD for a minority). |
| **America** | | | | |
| Studies 2 | N/A | N/A | Professional doctorate (MD), master’s degree, academic doctorate (PhD) | Anatomy (PhD increased by 29.4%). Physiotherapy (PhD increased by 16.5% and M decreased by 15.3%). Medicine (increased by 8.2%). Other healthcare fields (PhD increased by 24.7%).  Other non-medical disciplines: 12.9%. |
| Studies 4 | Teacher-tutors | N/A | Professional doctorate (MD), master’s degree | 1st year and 2nd year medical students, Medicine (15 educators: general surgery, orthopedics, neurosurgery, gynecology, radiology, ophthalmology, neurology, psychiatry). Anatomy and medicine (1 out of 15 educators). |
| Studies 5 | Full professors, associate teachers, assistant teachers, adjunct professors, senior lecturers | N/A | Academic doctorate (PhD), professional doctorate (MD), certificates | Anatomy (35.7% PhD; 4.8% Cert.), basic sciences (19.0% PhD), medicine (9.5% trained in the USA and 7.1% elsewhere). Anthropology (7.1% PhD). |
| Studies 6 | N/A | N/A | Academic doctorate, professional doctorate, master’s degree | Researchers (56.9% PhD), post-professional PhD (30.8%).  Occupational therapy only (31%), occupational therapy and anatomy (24.1%), including occupational therapy with M (7.7%).  Physiotherapy only (1.7%), physiotherapy and anatomy (8.6%). Anatomy only (31%). Medicine (17.2%), other 4.6%. |
| Studies 7 | Full professors, associate teachers, adjunct professors, assistant teachers | N/A | Academic doctorate (PhD): 77.8%; professional doctorate (MD): 15.3%; master’s degree: 1.4%; other: 5.5% | Anatomy (M and PhD). Physiotherapy (DPT: 70.4% graduated in the United States and 1.4% elsewhere).  Physiotherapy and anatomy (28.2%); physiotherapy only (71.8%). |
| Studies 8 | Full professors and researchers | Full-time, part-time, half-time | Master’s degree (53.27%); bachelor’s degree (28.50%); academic doctorate (PhD): (18.2%) | Physiotherapy, speech therapy, physical education, biology, nursing, midwifery, medicine, veterinary medicine, dentistry, medical technologies and others not specified.  Some also had continuing education: (25.23% specializations; 9.81% cert. and specialization; 8.41% postdoctoral; 3.74% postdoctoral/certification and specialization; 0.93% postdoctoral and specialization; 0.47% postdoctoral/  certifications and specialization). |
| Studies 9 | N/A | N/A | Professional doctorate (MD), academic doctorate (PhD) | Medicine, Anatomy (32.7%)    NB: In Mexico, anatomy educators are not required to have a PhD or master’s degree and most are physicians, 55.7% of whom do not have an anatomy degree. |
| Studies 10 | Teacher-tutors | N/A | 3rd year student-tutors | Physiotherapy |
| Studies 11 | Assistant teachers, tenure-track teachers | N/A | Academic doctorate (PhD): (58%); master’s degree (32%); bachelor’s degree (10%) | Anthropology biology (203 in PhD; 129 in M) |
| Studies 16 | Full professors, associate teachers, assistant teachers, adjunct professors, senior lecturers | Permanent | Academic doctorate (PhD): (55%); master’s degree (39%) | Anatomy and/or cellular biology (PhD), medicine.  Other doctorates (osteopathic medicine, dental surgery, veterinary medicine, education sciences, physiotherapy, anthropology, movement science, etc.). Mentoring training. 45.3% have postdoctoral training and 54.7% do not. |
| Studies 20 | Lecturers, full professors, assistant teachers, adjunct professors | Full-time | Academic doctorate (PhD) | Anatomy. Functional anatomy and evolution, biomedical sciences, education, anthropology biology, evolutionary biology. |
| Studies 21 | Teacher-tutors | N/A | 2nd year to 5th year medical student-tutors | Medicine |
| Studies 29 | N/A | N/A | Professional doctorate (MD), academic doctorate (PhD) mostly and others not specified | Anatomy (51%), cellular biology (19%), physiology (5%), neuroscience (5%) and others (developmental biology, evolutionary biology, physiotherapy, embryology), biomechanics.  Anthropology and social sciences (3%).  Medicine: (3% surgery, 1% family medicine, 1% pathology, 1% podiatry, 1% radiology). |
| Studies 34 | Full professors and researchers, senior lecturers, interim professors, associate professors, department heads | N/A | Professional doctorate (MD), academic doctorate (PhD) | Anatomy, non-anatomist scientist or educator. Physicians (Res. in radiology, surgery, orthopedics and others not specified). |
| Studies 35 | N/A | N/A | Academic doctorate (78% PhD), master’s degree, diploma in physiotherapy | Anatomy (49% PhD), sciences or arts (21.1% M), physiotherapy (42.7%) |
| Studies 36 | Full professors, associate teachers, assistant teachers, adjunct professors | Full-time, part-time | Academic doctorate (61% PhD), professional doctorate (8% MD), 4% MD-PhD, 6% master’s students, 5% medical students, 4% other | Anatomy (70% M, and PhD), medicine, 48% are researchers with external funding of whom 41% receive on-the-job training in anatomy |
| Studies 38 | N/A | N/A | Doctorate (PhD) (82.7%); master’s degree (15.3%).  Clinical diploma, 50%  1st/2nd cycle certificate | Anatomy (65.6%), sciences (15.3% M), physiotherapy (10%), other: philosophy, biology, exercise physiology, zoology |
| Studies 42 | N/A | Full-time, part-time | 1959 in United States: Academic doctorate (PhD: 67%), 63% PhD and master’s degree, 28% professional doctorate (MD), 6% MD-PhD  1959 in Canada: 78% professional doctorate (MD) | Anatomy or a related field for most of them, and others have a PhD and MD. Medicine (28% of them are full-time in the United States and 78% are full-time in Canada). Other: 44% pharmacology, 35% physiology, 12% biochemistry.  NB: PhD dominance in the United States and MD dominance in Canada in 1959. |
| **Asia** | | | | |
| Studies 3 | Full professors, associate teachers, assistant teachers, adjunct professors, senior lecturers | N/A | Professional doctorate (MD)  Other | 79.8% had formal education in anatomy, 18.9% informal and 1.3% unconfirmed. |
| Studies 19 | N/A | N/A | Academic doctorate (PhD) (45.6%); professional doctorate (MD) (44.3%); master’s degree and PhD (10.1%) | Medicine  Others not specified |
| Studies 31 | Lecturers, full professors, associate teachers, demonstrators (teacher-tutors) | N/A | Professional doctorate (MD) | Medicine (66% in surgery, 22% non-surgical)  Anatomy (12%) |
| **Europe** | | | | |
| Studies 1 | Full professors (21 anatomy centres out of 26), lecturers, associate teachers (3/26), and researchers | Temporary (19/26) | Professional doctorate (MD) mostly  Other | Medicine sometimes combined with anatomy or biology, biomedical sciences, physiotherapy, dentistry, scientists in anatomy or other related disciplines |
| Studies 22 | Teacher-tutors | N/A | Medical students in 2nd year to 6th year | Medicine |
| Studies 23 | N/A | N/A | N/A | Experts in anatomy (not specified) |
| Studies 24 | N/A | N/A | Clinical and non-clinical degrees  Percentage of medically qualified anatomy teachers decreased from 56% to 41% respectively between 1983-1984 and 2003-2004 | Medicine (clinicians)  Other |
| Studies 28 | N/A | N/A | Medical students in 4th year | Medicine |
| Studies 30 | Demonstrators | Full-time, part-time | Professional doctorate (MD) mostly  Academic doctorate (PhD) | Medicine (11 out of 21 departments). Others non-clinical, including PhD in anatomy or biology, neuroanatomy, physiology or other related fields. |
| Studies 33 | Lecturers | Full-time | Professional doctorate (MD), bachelor’s degree, master’s degree, academic doctorate (PhD) | Medicine and surgery (Res.) many of whom were associated with other qualifications in sciences (bachelor’s degree, master’s degree, doctorate). Research scientists. |
| Studies 37 | Demonstrators | Full-time, part-time, seasonal or casual | Professional doctorate (MD) | Medicine (clinicians, Res. surgery), pathology, surgical consultants, dentistry, surgical consultants.  Other: medical scientists. |
| Studies 39 | Full professors, demonstrator teachers | Fixed term | N/A | N/A |
| Studies 40 | Demonstrators | Full-time, part-time and temporary | Professional doctorate (MD) (79 out of 83 teachers);  non-medical degrees (4/83) | Medicine (79/83)  Others non-medical (4/83) |
| Studies 41 | Full professors, demonstrators, senior lecturers | Full-time and permanent, part-time and temporary | Professional doctorate (MD), other clinical degrees, bachelor’s degree, master’s degree | Medicine (clinician specialties, radiology, etc.), dentistry, retired surgeons, candidates taking a science fellowship, anatomy.    Ireland in 1978: 100% medicine and dentistry; in 1969: 94% medecine and dentistry, 6% sciences.    Great Britain in 1974: 66% medicine and dentistry, 34% sciences; in 1968: 83% medicine and dentistry, 17% sciences). |
| **Oceania** | | | | |
| Studies 13 | Full professors, teacher-tutors | Full-time permanent | Perrmanent staff: academic doctorate (PhD) and master’s degree (93%), enhanced degree (honours)  Session staff: doctorate (PhD), master’s degree, enhanced degree (honours), senior students | Anatomy, physiology, biochemistry or related disciplines (PhD and M in most universities).  Chiropractic (M in 2 universities**).** |
| Studies 18 | Demonstrators, teacher-tutors | Full-time, part-time, and temporary | Professional doctorate (MD) mostly, master’s degree, academic doctorate (PhD), 1st year to 4th year medical students, postdoctoral fellowships | Medicine (students: 13 respondents), surgery, postdoctoral research (3 teachers) or anatomy (PhD).  Other medical fields not specified. |
| Studies 25 | N/A | Full-time, part-time | Clinical and non-clinical academic degrees | Clinical training (3.5 members per school).  Others (4.0 members per school): students in medicine, physiotherapy, technicians, doctoral students. |
| **Other (articles whose data is from countries of various continents)** | | | | |
| Studies 14: Canada, United States, European Union | Lecturers, assistant teachers, adjunct professors | Full-time, part-time | Academic doctorate (PhD), master’s degree in science, other | Researchers, anatomical sciences education (M, PhD), cellular biology, neuroscience (M, PhD), clinical degrees (MD, DPT). Anthropology (M), Sciences M). |
| Studies 26: United States, Europe | N/A | N/A | Academic doctorate (PhD)  Professional doctorate (MD / DPT (less common) | Basic sciences (26% PhD), anatomical sciences (22% PhD), medicine (clinicians).  Medicine (clinicians), physiotherapy (DPT). |
| Studies 32: United States, France | Lecturers | N/A | France: professional doctorate (MD)  United States: N/A | France: medicine (clinicians with hospital duties) |

** M: master’s degree, PhD: doctorate in philosophy, Dr.: Doctor, Bac: bachelor’s degree, MD: physician, DPT: doctorate in physiotherapy, Res.: resident in hospital specialization, Cert.: Certifications, MBBS: Bachelor of Medicine, Bachelor of Surgery.*

**Table 4- Teaching strategies and course content taught to students, as well as evaluation strategies and their impact in anatomy teaching.**

| **Studies** | Teaching strategies | Content taught (systems, organs or specialized sub-fields) | Evaluation strategies | **Impact** |
| --- | --- | --- | --- | --- |
| Study 1 | Lecture, cadaveric dissection, virtual dissection, medical imaging technologies (ultrasonography) | N/A | N/A | N/A |
| Study 2 | Lecture, cadaveric dissection, cadaveric prosection, anatomical models, plastinated specimens, computer-assisted technologies, other | N/A | N/A | N/A |
| Study 4 | Cadaveric dissection, cadaveric prosection, peer teaching | N/A | N/A | N/A |
| Study 5 | N/A | Content combines specialized sub-fields: macroanatomy, histology, embryology, neuroanatomy | N/A | N/A |
| Study 6 | Lecture, cadaveric dissection, cadaveric prosection, anatomical models, plastinated specimens, medical imaging technologies, use of virtual reality | Systems taught are: musculoskeletal system, peripheral nervous system, central nervous system, cardiovascular system, respiratory system, reproductive system, renal system, endocrine system, gastrointestinal system | N/A | N/A |
| Study 7 | Cadaveric dissection, cadaveric prosection, peer teaching, anatomical models in clay, drawings, use of virtual reality and mobile applications | N/A | Written exams and anatomy laboratory practical tests | N/A |
| Study 9 | Cadaveric dissection, cadaveric prosection, anatomical models | Content combines specialized sub-fields: neuroanatomy, histology, embryology | N/A | N/A |
| Study 10 | Lecture, cadaveric dissection, cadaveric prosection, medical imaging techniques, peer teaching | Skeletal system | Written exams (MCQ)*, practical tests on human cadavers and skeletons, weekly evaluation | N/A |
| Study 11 | Lecture, cadaveric dissection, cadaveric prosection, animal dissection, virtual dissection, plastinated specimens | Content combines specialized sub-fields: macroscopic anatomy / clinical anatomy / functional anatomy / evolutionary anatomy / comparative anatomy, histology, embryology, neuroanatomy  Skeletal system | N/A | N/A |
| Study 13 | Lecture, cadaveric dissection, cadaveric prosection, anatomical models, plastinated specimens, medical imaging technologies (radiology) | Content combines specialized sub-fields: macroscopic anatomy / topographic anatomy, histology, embryology, neuroanatomy | Written exams, practical tests (quiz during tutorials) | N/A |
| Study 14 | NA | Content combines specialized sub-fields: macroscopic anatomy, neuroanatomy, histology, embryology | N/A | N/A |
| Study 15 | Cadaveric dissection, plastic anatomical models, medical imaging technologies, computer software | N/A | N/A | N/A |
| Study 16 | Lecture, cadaveric dissection, cadaveric prosection | Content combines specialized sub-fields: physiology, histology, embryology, comparative/  vertebrate anatomy, neuroanatomy | N/A | N/A |
| Study 17 | Lecture, cadaveric dissection, cadaveric prosection, anatomical models, plastinated specimens | N/A | Written exams (MCQ, short/long form questions), oral exams (viva voce), timed and untimed spot tests | No significant difference between timed and untimed evaluations on students’ academic performance.  Oral exams enabled testing of students’ ability to organize their ideas coherently and precisely. |
| Study 18 | Lecture, cadaveric dissection, cadaveric prosection, medical imaging technologies (radiology), tutorials, peer teaching | N/A | N/A | N/A |
| Study 20 | Lecture, cadaveric dissection, optical and virtual microscopies, peer teaching, clinical cases | Content combines specialized sub-fields: histology, embryology  Musculoskeletal system, neuroanatomy | N/A | N/A |
| Study 21 | Lecture, practical laboratories, medical imaging technologies, peer teaching | N/A | N/A | N/A |
| Study 22 | Peer teaching, imaging technologies (ultrasonography) | Cervical and abdominal regions | Identification of anatomical structures on radiological images | Identification of anatomical structures on ultrasound images to test the practical understanding of anatomy in a clinical context. |
| Study 23 | Lecture, conferences, cadaveric dissection, cadaveric prosection, anatomical models, medical imaging technologies (radiology) | N/A | Written exams, spotter exams | N/A |
| Study 24 | Conferences, cadaveric dissection, cadaveric prosection, anatomical models, tutorials | N/A | Written exams (MCQ, short/long form questions), oral tests, drawings, identification of anatomical structures using human cadaver images | MCQ and open-ended questions have similar impacts when evaluating students’ knowledge. However, exclusive use of MCQ could adversely affect long-term retention of concepts. |
| Study 25 | Cadaveric dissection, plastinated specimens or models, medical imaging or computer-generated technologies, clinical scenarios | N/A | Written exams (MCQ, short/long form questions) | N/A |
| Study 26 | Cadaveric dissection, cadaveric prosection, use of software support | N/A | N/A | N/A |
| Study 27 | Lecture, cadaveric dissection, cadaveric prosection, articulated skeletons, museum bones, medical imaging technologies (radiology, endoscopy), histological slides | Content combines specialized sub-fields: macroanatomy, histology, embryology | Written exams (MCQ, short/long form questions) oral exams, one-off practical tests | N/A |
| Study 29 | Lecture, cadaveric dissection, cadaveric prosection, anatomical models, medical imaging technologies (radiology), embryology and histology laboratories | Content combines specialized sub-fields: macroanatomy, neuroanatomy, histology, embryology | Written exams (MCQ, short/long form questions), anatomy laboratory practical tests, reading anatomical structures on histological slides and radiological images | N/A |
| Study 30 | Lecture, cadaveric dissection, plastic anatomical models, microscopy | Content combines specialized sub-fields: macroanatomy, neuroanatomy, histology, embryology | Written exams (MCQ, case studies), anatomy laboratory practical tests, research projects | N/A |
| Study 32 | Lecture, cadaveric dissection, cadaveric prosection, surface anatomy, use of videos | Content combines specialized sub-fields: macroanatomy, histology | Written exams, oral tests in the dissection room, national exam for the United States | N/A |
| Study 33 | Cadaveric dissection | N/A | N/A | N/A |
| Study 34 | Lecture, cadaveric dissection, medical imaging technologies (endoscopy, laparoscopy) | Content combines specialized sub-fields: macroanatomy, histology embryology | Quiz and formal review sessions | N/A |
| Study 35 | Cadaveric dissection, cadaveric prosection, use of software | N/A | N/A | N/A |
| Study 36 | Lecture, cadaveric dissection, cadaveric prosection, plastic models, museum models, specimens in glass, films, videos, tutorials, medical imaging techniques (radiology) | N/A | Written exams (MCQ, surprise quizzes, problem-based case studies, true or false questions, matching, short-answer questions, development-type questions). Identification of anatomical structures in laboratories or MCQ / short-answer questions. Identification of structures on radiographic images, scanner and magnetic resonance imaging, extra points for laboratory participation. | N/A |
| Study 38 | Cadaveric dissection, cadaveric prosection, surface anatomy, anatomical models, visual aids | N/A | N/A | N/A |
| Study 39 | Lecture, cadaveric dissection, medical imaging technologies (radiology), surface anatomy | Content combines specialized sub-fields: neuroanatomy, histology, embryology | Written exams (MCQ), practice exams, structured oral exams, end-of-course and end-of-year synoptic exams, weekly oral exam. | N/A |
| Study 41 | Lecture, cadaveric dissection, seminars, tutorials | N/A | N/A | N/A |
| Study 42 | Cadaveric dissection | Arm, thorax, leg | N/A | N/A |

**MCQ: Multiple choice questions*
